# Supplementary material for: Chiral detection at a liquid–liquid interface
Source: Royal Society of Chemistry journal article supplement (doi:10.1039/b822685g), 2009-01-01
Supplement: b822685g.pdf [file b822685g.pdf]

## Chiral detection at a liquid–liquid interface

Ritu Katakya\* and Paula Lopes

Department of Chemistry, University of Durham, Durham, UK DH1 3LE. E-mail:  
[ritu.katakya@durham.ac.uk](mailto:ritu.katakya@durham.ac.uk); Fax: 44 191 3484737; Tel: 44 1913342091

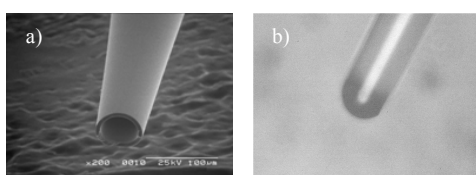

**Figure S1:** These pictures show a) the diameter of the pipette tip (SEM, resolution: 600 xs and 200 xs), b) applying a positive pressure (optic microscope, resolution: 250x).

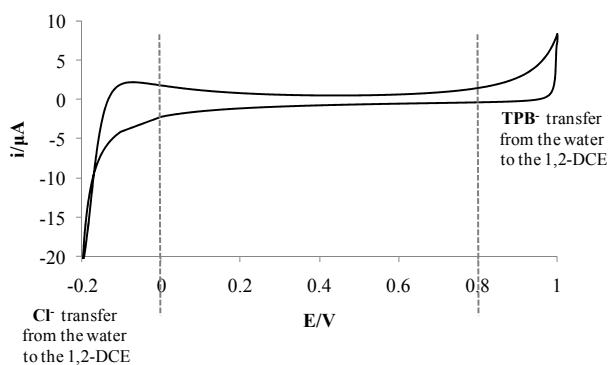

**Figure S2:** Cyclic voltammogram showing the potential window given by the interface between TBATPB solution in 1,2-DCE and aqueous solution of KCl, SR: 5mV/s.
